# Supplementary material for: Perceptions of complementary/alternative medicine use and influence on evidence-based asthma medicine adherence in Malaysian children
Source: PubMed Central journal article supplement (PMC6389881; doi:10.1038/s41533-019-0118-x), 2019-02-25
Supplement: 41533_2019_118_MOESM1_ESM.pdf [file 41533_2019_118_MOESM1_ESM.pdf]

**Childhood Asthma**  
**Participant Interview Topic Guide (parents)**

**Preamble:**

- **Ice-breaking and explain that there is no right or wrong answer**
- **Explain need to get consent for the interview and audio-recording. Obtain consents.**
- **Explain that the participant does not have to answer if he or she does not wish to do so**

| Question                                                                                                                                                                                                                                                                                                                                                                                                                                    | Prompts                                                                                                                                                                                                                                                                                                                                                                                                                                               |
|---------------------------------------------------------------------------------------------------------------------------------------------------------------------------------------------------------------------------------------------------------------------------------------------------------------------------------------------------------------------------------------------------------------------------------------------|-------------------------------------------------------------------------------------------------------------------------------------------------------------------------------------------------------------------------------------------------------------------------------------------------------------------------------------------------------------------------------------------------------------------------------------------------------|
| <p><b>Asthma experience</b></p> <p>What do you know about asthma?</p> <p>Tell us about your child’s asthma? How is it now?</p> <p>How do you know if your child’s asthma is good or bad?</p> <p>How does your child’s asthma disturb/not disturb he/her? How?<br/> How does your child’s asthma disturbs/not disturb you? How?</p> <p>How does having asthma makes your child feel?</p> <p>How does your child’s asthma makes you feel?</p> | <p>Experience? Reading? Told by someone?</p> <p>Cough, nighttime cough, difficulty breathing?</p> <p>Able to play? Easy breathing? No cough?<br/> <b>Where do you know about this?</b></p> <p>Activities affected e.g school? swimming, PJK, sleeping in fan? air conditioned room? Early morning or night bath? Play in the rain?</p> <p>Friends isolation/bully- because of illness, using inhalers, shy? Okay?</p> <p>Anxious? Overprotective?</p> |
| <p><b>Asthma self-management</b></p> <p>What do you do when your child has asthma?</p> <p>How about other treatment? Complementary or alternative medicine?</p> <p>Who take care of your child’s asthma at home? School?</p> <p>Does your child take anything else other than these for his/her asthma? (showing inhalers and syrup )</p>                                                                                                   | <p>Inhaler? Go to hospital/clinic? Asthma action plan? <b>How do you know this?</b></p> <p>How do you use it? Why do you use it?</p> <p>You? Your child? Maid? What do you/they do?</p> <p>Other medication from doctors?</p>                                                                                                                                                                                                                         |
| <p><b>Asthma treatment</b></p> <p>Tell us about your child’s medicine.</p>                                                                                                                                                                                                                                                                                                                                                                  | <p>Pills? MDI? Spacer? Aerochamber? Have you seen ‘these’ (peak flow meter) before? How do you use it?<br/> <b>When do you use your medication?How often?</b></p> <p>Which medication is better? Reliever ? controller?</p> <p>How would you know when do your child needs the pump?</p>                                                                                                                                                              |

|                                                                                                                                                                                                                                                                                                                                                  |                                                                                                                                                                                                                                                                                                                                                                                                                                         |
|--------------------------------------------------------------------------------------------------------------------------------------------------------------------------------------------------------------------------------------------------------------------------------------------------------------------------------------------------|-----------------------------------------------------------------------------------------------------------------------------------------------------------------------------------------------------------------------------------------------------------------------------------------------------------------------------------------------------------------------------------------------------------------------------------------|
| <p>How do you feel about your child taking medicines?</p> <p>How often do your child see the doctor for asthma?</p> <p>When your child goes to clinic what was usually done?</p> <p>What do you think about the clinic visits for asthma (clinic, doctor &amp; medications)?</p> <p>How do you feel when you accompany your child to clinic?</p> | <p>Dislike? Troublesome? Ashamed? <b>Why?</b></p> <p>Follow up? Emergency (hospital)? Stay in hospital ? When? Why?</p> <p>Explanation? Medication?</p> <p>Difficult access? Language barrier? Waiting time? Unfriendly staff?</p> <p>Unpleasant? Okay?</p>                                                                                                                                                                             |
| <p><b>Health belief about asthma</b></p> <p>Why do you think your child has asthma?</p> <p><b>What triggers your child's asthma?</b></p> <p>What other things you do/eat for your child's asthma?</p> <p>Do you have rules about asthma? (Things to avoid to prevent asthma, In Malay " Pantang")</p>                                            | <p>Inherited? Infection? Environment?</p> <p><b>Dust? Physical activity? Cold weather?</b></p> <p>Home nebulizer? How does it help?<br/>Homeopathy? Which method is better for you?<br/><b>Why? Where did you know this from? What does your child usually eats?</b></p> <p>Food, drinks or activities? Any other rules?<br/>Who makes the rules? <b>Experience? Or from somewhere? What will happen when they break the rules?</b></p> |
| <p><b>Source of information</b></p> <p>Where and from whom did you get information about asthma?</p> <p>Anything else that you want to share about your child's asthma?</p>                                                                                                                                                                      | <p>Clinic? Family? Friends? Internet? How good is the information?</p>                                                                                                                                                                                                                                                                                                                                                                  |
